# Supplementary material
Source: PubMed Central journal article supplement (PMC4833566)

Figure 1C

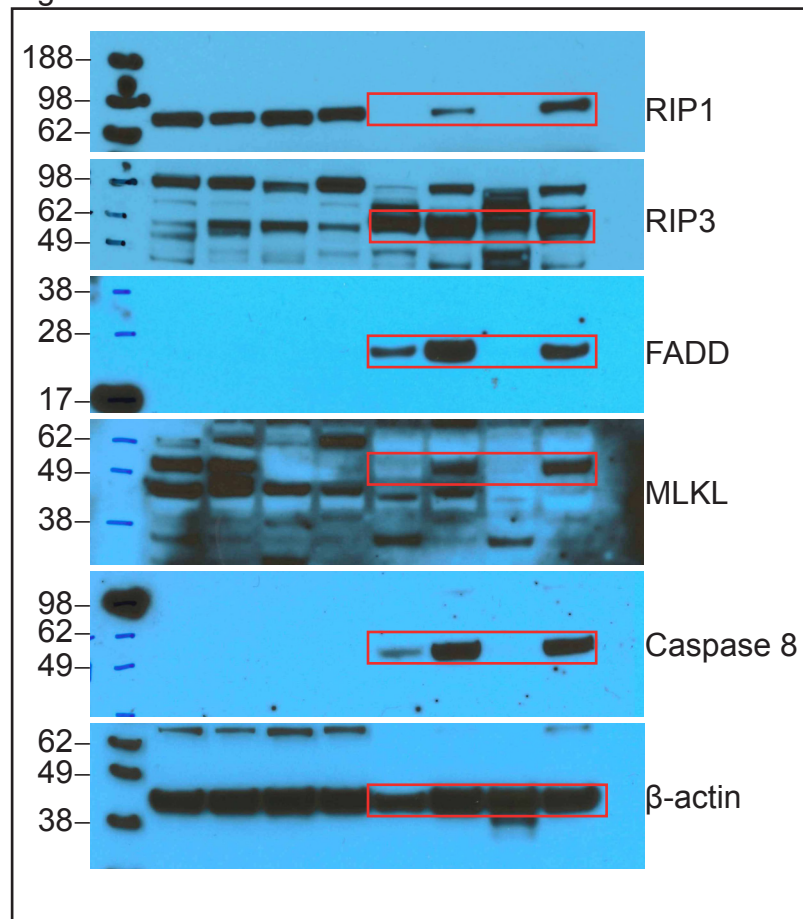

Figure 1G

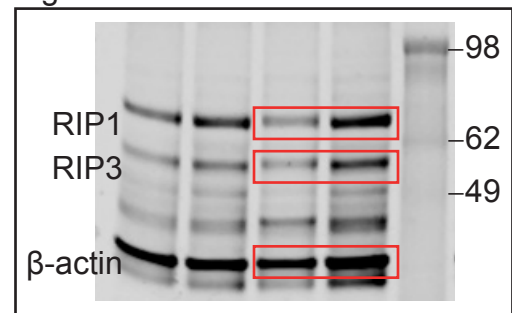

Figure 1I

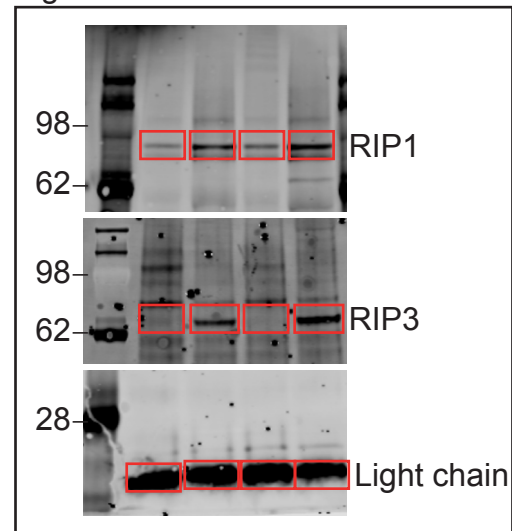

Extended Data Figure 1

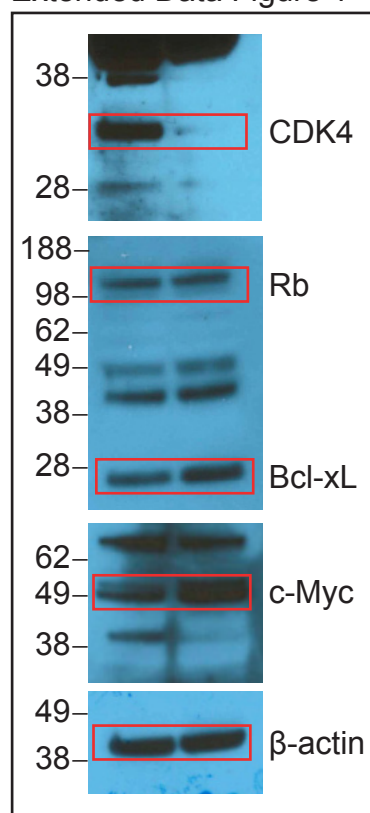

Extended Data Figure 5

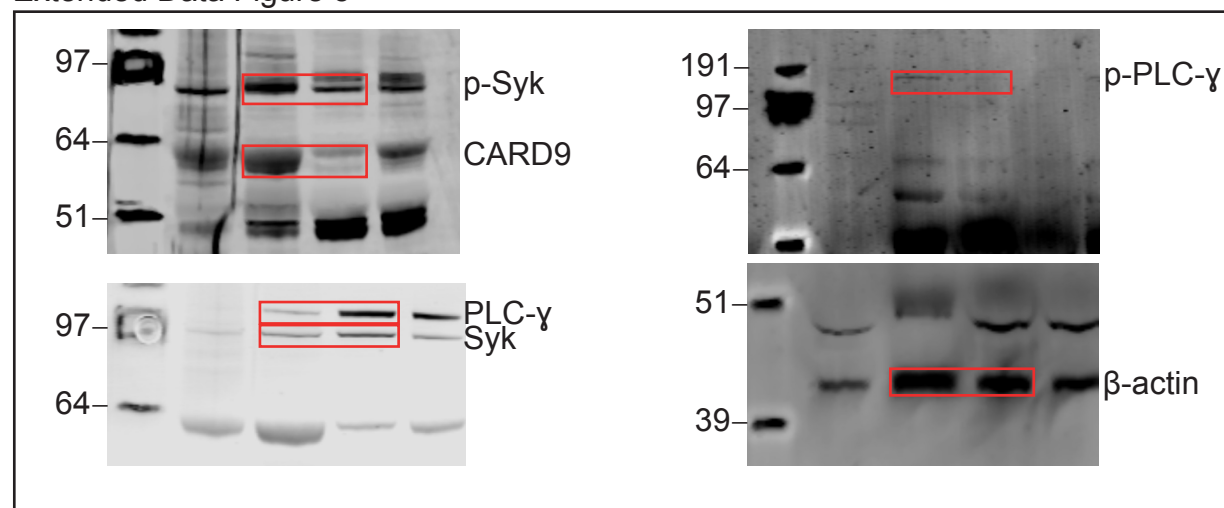

Extended Data Figure 6

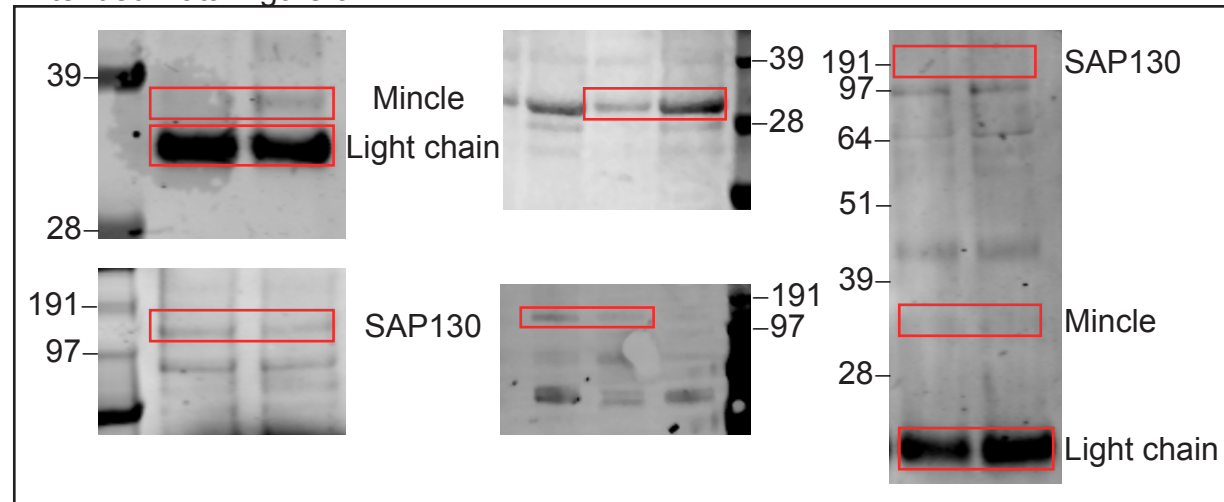

Supplement: NIHMS758297-supplement-2.pdf [file NIHMS758297-supplement-2.pdf]
